# Supplementary material for: A self-supported FeNi layered double hydroxide anode with high activity and long-term stability for efficient oxygen evolution reaction
Source: Royal Society of Chemistry journal article supplement (doi:10.1039/d1se00558h), 2021-01-01
Supplement: d1se00558h1.pdf [file d1se00558h1.pdf]

## Supporting information

### A self-supporting anode with high activity and long-term stability for efficient water-splitting

Mingyu Su, Shengli Zhu, Zhenduo Cui, Zhaoyang Li, Shuilin Wu, Hui Jiang\* and Yanqin Liang\*

School of Materials Science and Engineering, Tianjin University, Tianjin 300072, China

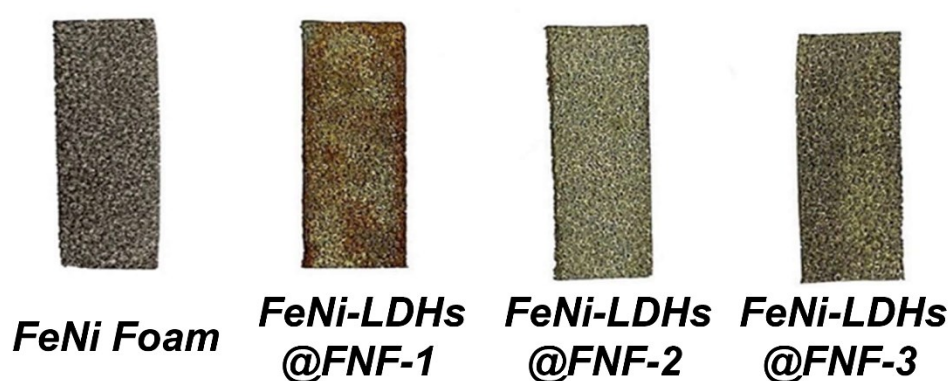

**Fig. S1** Appearance of FeNi-LDHs prepared in  $\text{NiSO}_4$  solution with varying  $\text{Ni}^{2+}$  concentration.

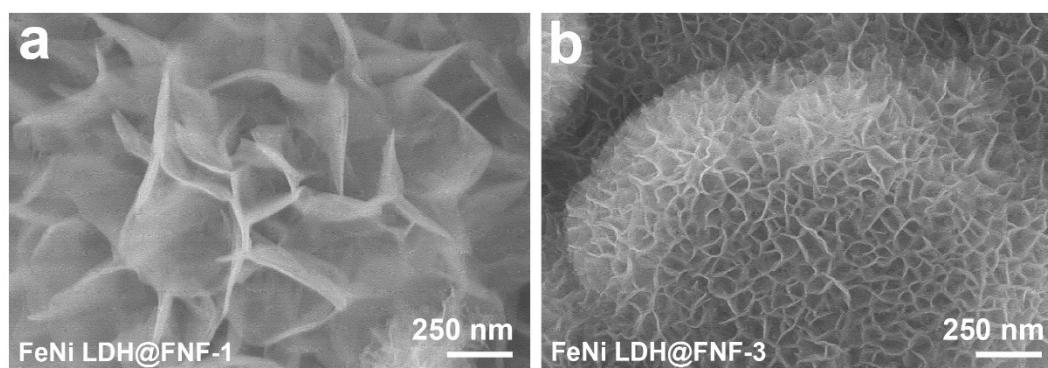

**Fig. S2** (a) SEM images of FeNi-LDH@sFNF-1. (b) SEM image of FeNi-LDHs@FNF-3.

\*Corresponding author: [h.jiang@tju.edu.cn](mailto:h.jiang@tju.edu.cn) (H. Jiang)

\*Corresponding author: [yqliang@tju.edu.cn](mailto:yqliang@tju.edu.cn) (Y. Q. Liang)

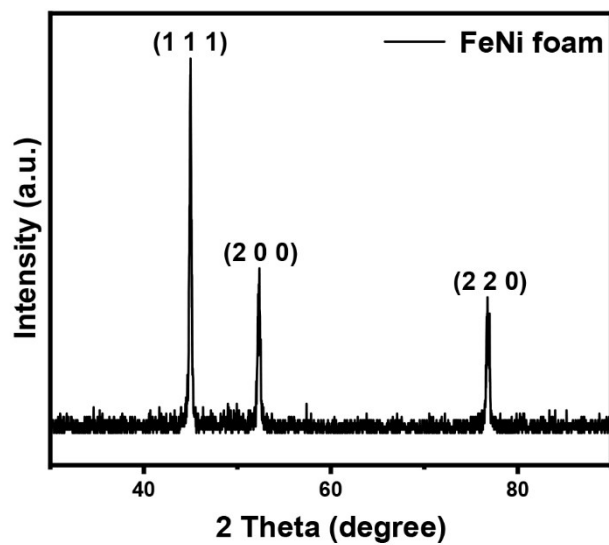

**Fig. S3** XRD spectra of FeNi foam.

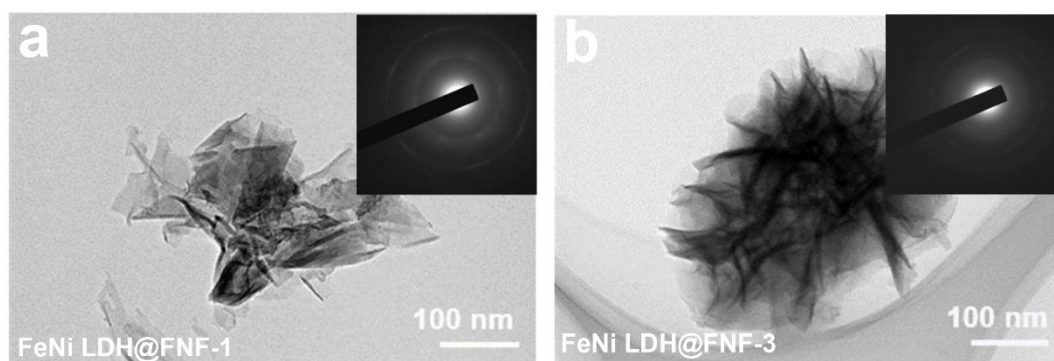

**Fig. S4** (a) TEM image of FeNi-LDHs@FNF-1. (b) TEM image of FeNi-LDHs@FNF-3.

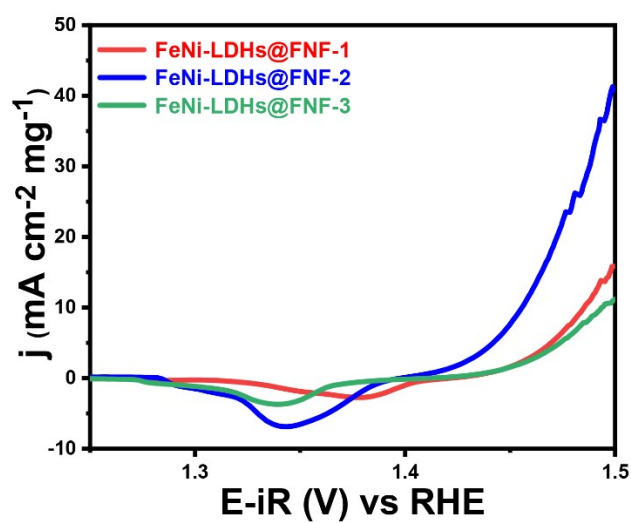

**Fig. S5** Polarization curves of FeNi-LDHs normalized with catalyst mass.

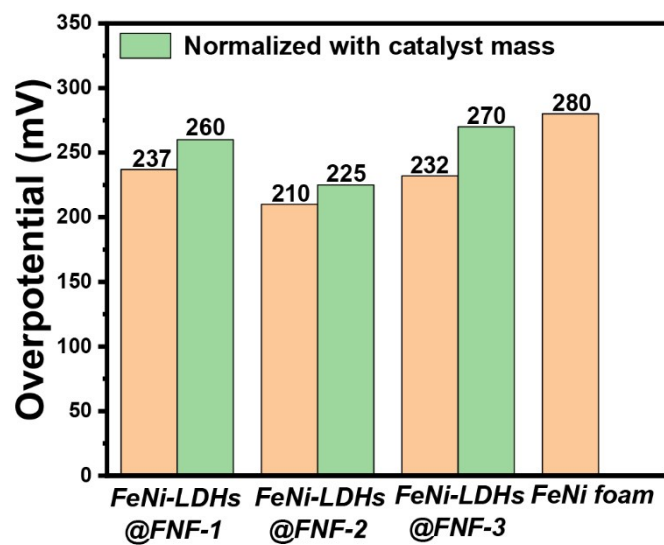

**Fig. S6** Overpotential of FeNi-LDHs grown at different concentrations.

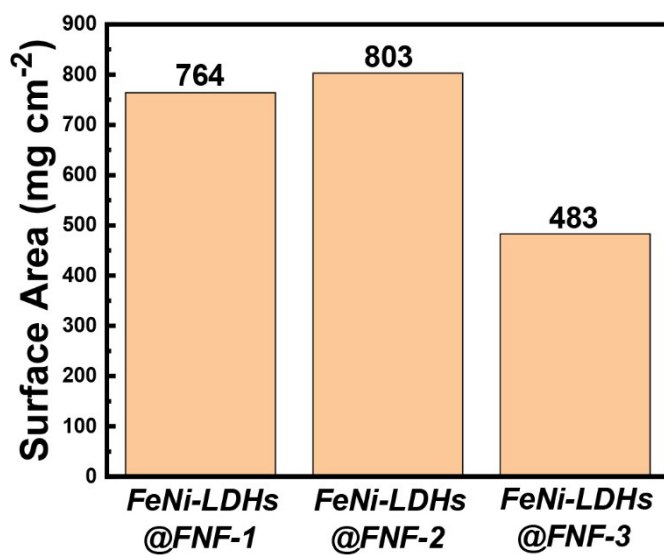

**Fig. S7** BET surface area of FeNi-LDHs grown at different concentrations.

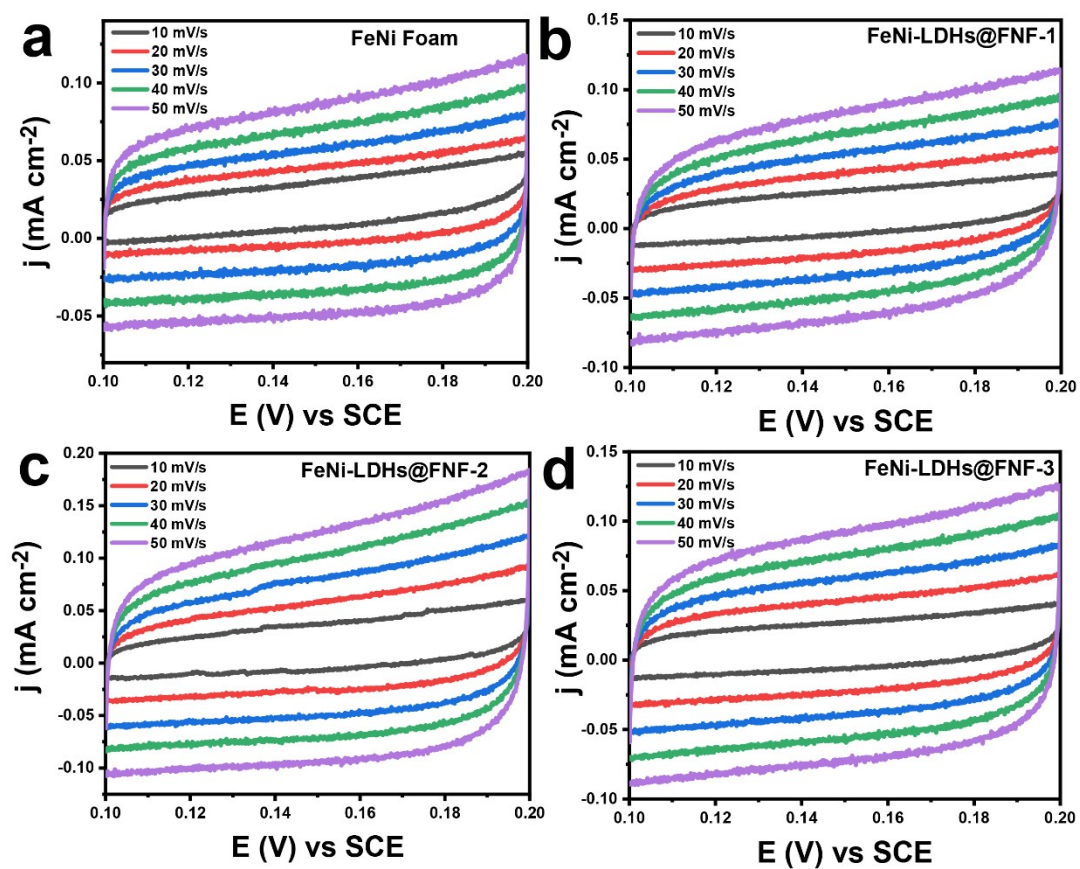

**Fig. S8** (a, b, c, d) ECSA curves of FeNi-LDHs grown on FeNi foam under different  $\text{NiSO}_4$  concentrations.

**Table S1** Process comparison of different OER catalysts (\* is the catalyst developed in this article)

| Catalyst      | Preparation                                                                                                                                                                                                                                                                                                                                                       | Chemicals                                                                                                                                                                   |
|---------------|-------------------------------------------------------------------------------------------------------------------------------------------------------------------------------------------------------------------------------------------------------------------------------------------------------------------------------------------------------------------|-----------------------------------------------------------------------------------------------------------------------------------------------------------------------------|
| FeNi-LDHs-rGO | <ol style="list-style-type: none"> <li>1. Synthesis of FeNi LDH by hydrothermal method.</li> <li>2. Decarbonisation of FeNi LDH.</li> <li>3. Synthesis of GO from natural graphite by a modified Hummers method.</li> <li>4. Embedding graphene oxide into the FeNi LDH layer by anion exchange.</li> <li>5. Reduction of FeNi-GO LDH to FeNi-rGO LDH.</li> </ol> | ferrous chloride,<br>nickel chloride,<br>urea aqueous,<br>trisodium trate,<br>hydrochloric acid,<br>sodium chloride,<br>natural graphite,<br>hydrazine hydrate,<br>ammonium |
| NiFe-LDHs/CNT | <ol style="list-style-type: none"> <li>1. Oxidization of carbon nanotubes.</li> <li>2. Synthesis of NiFe LDH on multi-walled carbon nanotubes by solvothermal method.</li> </ol>                                                                                                                                                                                  | carbon nanotubes<br>sulfuric acid<br>sodium nitrate<br>potassium permanganate<br>hydrogen peroxide<br>N,N-dimethylformamide<br>nickel acetate<br>ferrous nitrate            |
| N-NiFe-LDHs   | Synthesis of N-NiFe LDH on nickel foam in the chemical bath.                                                                                                                                                                                                                                                                                                      | nickel acetate<br>hexamethylene tetramine                                                                                                                                   |

|                                                               |                                                                                                                                                                                                                                                                                   |                                                                                                                                                                                      |
|---------------------------------------------------------------|-----------------------------------------------------------------------------------------------------------------------------------------------------------------------------------------------------------------------------------------------------------------------------------|--------------------------------------------------------------------------------------------------------------------------------------------------------------------------------------|
|                                                               |                                                                                                                                                                                                                                                                                   | iron nitrate<br><br>ethanol                                                                                                                                                          |
| n-NiFe-LDHs/NGF                                               | <p>1. Preparation of magnesium oxide template by surfactant-assisted hydrothermal reaction.</p> <p>2. Synthesis of NGF via CVD method with the as-obtained MgO as templates.</p> <p>3. Synthesis of n-NiFe LDH/NGF via urea-assisted precipitation with NGF as the substrate.</p> | <p>magnesium oxide</p> <p>polyethylene glycol</p> <p>methane/ammonia</p> <p>hydrochloric acid</p> <p>N-methylpyrrolidone</p> <p>nickel nitrate</p> <p>ferric nitrate</p> <p>urea</p> |
| <p>NiCo-LDHs/Ni</p> <p>NiMn-LDHs/Ni</p> <p>NiCoMn-LDHs/Ni</p> | <p>Synthesis of NiCo LDH, NiMn LDH and NiCoMn LDH on nickel foam by hydrothermal method.</p>                                                                                                                                                                                      | <p>nickel acetate</p> <p>cobalt acetate</p> <p>manganese acetate</p> <p>sodium carbonate</p> <p>sodium hydroxide</p> <p>urea</p>                                                     |
| *FeNi-LDHs/FeNi                                               | <b>Synthesis of FeNi-LDHs on FeNi foam at room temperature.</b>                                                                                                                                                                                                                   | <b>nickel sulfate</b>                                                                                                                                                                |

#### Some calculation formulas involved in the article:

The overpotential is calculated by the following equation:

$$E \text{ (vs. RHE)} = E \text{ (vs. SCE)} + 1.0672 \text{ V}$$

$$\eta_{OER} = E \text{ (vs. RHE)} - 1.23 \text{ V}$$

The ECSA is calculated by the following equation:

$$ECSA = Cdl/Cs(40 \mu F cm^{-2})$$

The electric quantity of Ni reduction is calculated by the following equation:

$$Q = \frac{\int j \cdot t dt}{m(Ni)}$$

$\int j \cdot t dt$  is obtained by the integration of the j-t curve (Fig.S4).  $m(Ni)$  is obtained from the catalyst mass (By measuring the quality difference of samples before and after chemical corrosion. FeNi-LDHs@FNF-1: 2 mg, FeNi-LDHs@FNF-2: 2 mg, FeNi-LDHs@FNF-3: 3 mg) and XPS element content.
